# Supplementary material for: Age, growth, and natural mortality of schoolmaster (Lutjanus apodus) from the southeastern United States
Source: PeerJ. 2016 Oct 4;4:e2543. doi: 10.7717/peerj.2543 (PMC5068441; doi:10.7717/peerj.2543)
Supplement: Supplemental Information 1 [file peerj-04-2543-s001.xlsx]

## Sheet: RawData
Box #	Box position	slide ID	Source	Date	Collection #	Sample #	Trip Type	Month	Day	Year	Area	County	State	Species	Sex	TL_mm	FL_mm	SL	wt_kg	BurtonRings	Burton_Edgetype	Burt_Quality	Potts_rings	PottsEdge	Potts Qual	Diff	Agree (Y?N)	Average	Error	APE	Month	CAL_Age	Frac_age
SMS-1	1	1	HB	1981-03-14	5849	9	HB	3	14	1981	12	Monroe	FL	Schoolmaster		238				3	4	D	3	4	D	0	Y	3	0	4.47305	3	4	3.75
SMS-1	2	2	HB	1985-05-14	12363	5	HB	5	14	1985	11		FL	Schoolmaster		321			0.65	3	2	D	3	4	C	0	Y	3	0		5	4	3.91667
SMS-1	3	3	HB	1985-12-10	13754	9	HB	12	10	1985	11		FL	Schoolmaster		304			0.4	4	2	D	4	4	D	0	Y	4	0		12	4	4.5
SMS-1	4	4	HB	1986-04-18	14171	6	HB	4	18	1986	11		FL	Schoolmaster		360			0.82	5	2	D	5	4	D	0	Y	5	0		4	5	4.83333
SMS-1	5	5	HB	1986-05-06	14527	13	HB	5	6	1986	11		FL	Schoolmaster		327			0.8	8	1	E	9	1	D	-1	N	8.5	0.0588235		5	8	7.91667
SMS-1	6	6	HB	1986-06-06	14595	9	HB	6	6	1986	11		FL	Schoolmaster		331			0.7	4	2	D	4	4	C	0	Y	4	0		6	5	5
SMS-1	7	7	HB	1988-07-06	17947	4	HB	7	6	1988	12		FL	Schoolmaster		306			0.63	5	2	D	6	2	D	-1	N	5.5	0.0909091		7	5	5.08333
SMS-1	8	8	HB	1991-08-10	19728	4	HB	8	10	1991	12		FL	Schoolmaster		263			0.26	3	2	C			A						8	3	3.16667
SMS-1	9	9	HB		31701	5	HB
SMS-1	10	10	TIP	1999-06-15	99103800272	6	CM	6	15	1999	11		FL	Schoolmaster	F	310.98	292			4	2	D	6	2	D	-2	N	5	0.2		6	4	4
SMS-1	11	11	TIP	1999-07-14	99103800296	45	CM	7	14	1999	11		FL	Schoolmaster	F	299.65	281			5	3	D	5	2	C	0	Y	5	0		7	6	6.08333
SMS-1	12	12	TIP	1999-08-24	99103800359	11	CM	8	24	1999	11		FL	Schoolmaster	M	255.36	238			4	2	C			A						8	4	4.16667
SMS-1	13	13	TIP	1999-10-12	99103800413	30	CM	10	12	1999	11		FL	Schoolmaster	M	336.73	317			10	3	D	11	3	D	-1	N	10.5	0.047619		10	10	10.3333
SMS-1	14	14	TIP	1999-11-23	99103800437	12	CM	11	23	1999	11		FL	Schoolmaster	M	293.47	275			4	4	E	4	4	D	0	Y	4	0		11	4	4.41667
SMS-1	15	15	TIP	1999-12-20	99103800477	27	CM	12	20	1999	11		FL	Schoolmaster	M	355.27	335			3	1	E	3	1	C	0	Y	3	0		12	3	3.5
SMS-1	16	16	TIP	1999-12-20	99103800477	28	CM	12	20	1999	11		FL	Schoolmaster	F	291.41	273			1			1	4	D	0		1	0		12	1	1.5
SMS-1	17	17	TIP	2000-08-08	3800315	27	CM	8	8	2000	11		FL	Schoolmaster	M	314.07	295			3	3	B			A						8	3	3.16667
SMS-1	18	18	TIP	2000-06-02	3800256	7	CM	6	2	2000	11		FL	Schoolmaster	M	318.19	299			5	2	E	6	1	D	-1	N	5.5	0.0909091		6	6	6
SMS-1	19	19	TIP	2001-07-19	3800120	26	CM	7	19	2001	11		FL	Schoolmaster	M	332.61	313			8	2	D	8	1	C	0	Y	8	0		7	8	8.08333
SMS-1	20	20	TIP	2001-08-14	3800139	26	CM	8	14	2001	11		FL	Schoolmaster	M	331.58	312			5	4	E	6	2	D	-1	N	5.5	0.0909091		8	6	6.16667
SMS-1	21	21	TIP	2003-05-29	3800133	15	CM	5	29	2003	11		FL	Schoolmaster	M	541.7	516			6	1	D	6	1	D	0	Y	6	0		5	6	5.91667
SMS-1	23	23	TIP	2003-07-01	3800146	3	CM	7	1	2003	11		FL	Schoolmaster	M	645.73	617			7	2	E	8	1	D	-1	N	7.5	0.0666667		7	8	8.08333
SMS-1	24	24	TIP	2003-07-01	3800146	4	CM	7	1	2003	11		FL	Schoolmaster	M	556.12	530			6	1	E	6	2	D	0	Y	6	0		7	6	6.08333
SMS-1	25	25	TIP	2003-07-01	3800146	5	CM	7	1	2003	11		FL	Schoolmaster	M	453.12	430			5	2	E	5	2	D	0	Y	5	0		7	5	5.08333
SMS-1	26	26	TIP	2003-07-01	3800146	6	CM	7	1	2003	11		FL	Schoolmaster	M	469.6	446			6	2	E	6	1	D	0	Y	6	0		7	6	6.08333
SMS-1	27	27	TIP	2003-07-23	3800168	26	CM	7	23	2003	11		FL	Schoolmaster	F	531.4	506			6	2	E	6	1	D	0	Y	6	0		7	6	6.08333
SMS-1	28	28	TIP	2003-07-23	3800168	27	CM	7	23	2003	11		FL	Schoolmaster	F	496.38	472			5	1	E	5	1	D	0	Y	5	0		7	5	5.08333
SMS-1	29	29	TIP	2004-01-13	36213	9	HB	1	13	2004	Area 11			Schoolmaster	M	300	290			6	3	D	7	4	C	-1	N	6.5	0.0769231		1	7	6.58333
SMS-1	30	30	TIP?	2004-01-14	BFT2004001	1	FI	1	14	2004	10		NC	Schoolmaster		170	158			1	4	D	1	4	D	0	Y	1	0		1	2	1.58333
SMS-1	31	31		2004-05-10	36478	8	HB	5	10	2004	11		FL	Schoolmaster	M	342	320		0.71	6	1	E	6	4	D	0	Y	6	0		5	6	5.91667
SMS-1	32	32	TIP	2004-07-09	TQ0401427	D	PC	7	9	2004	11		FL	Schoolmaster	M	378	356		0.88	6	2	D	8	1	D	-2	N	7	0.142857		7	6	6.08333
SMS-1	33	33	TIP	2004-10-31	TQ0402638	D	PC	10	31	2004	11		FL	Schoolmaster	M	410	396		1.45	8	3	D	9	3	D	-1	N	8.5	0.0588235		10	8	8.33333
SMS-1	34	34		2005-06-18	37400	20	HB	6	18	2005	11		FL	Schoolmaster	M	327	300			5	2	C	6	1	D	-1	N	5.5	0.0909091		6	6	6
SMS-1	35	35	FMRI	2005-07-14	TQ0501059	D	PC	7	14	2005	11		FL	Schoolmaster	M	322.31	303			7	2	C	8	1	D	-1	N	7.5	0.0666667		7	7	7.08333
SMS-1	36	36	FMRI	2005-08-13	TQ0502556	D	HB	8	13	2005	11		FL	Schoolmaster	F	310	300		0.54	9	2	C	11	2	D	-2	N	10	0.1		8	10	10.1667
SMS-1	37	37	FMRI	2005-08-17	KY0500380	D	CM	8	17	2005	12		FL	Schoolmaster	U	374	367			3	3	D	3	2	D	0	Y	3	0		8	3	3.16667
SMS-1	38	38	FMRI	2005-09-10	37496	27	HB	9	10	2005	11		FL	Schoolmaster	U	290	270			3	4	E	3	3	E	0	Y	3	0		9	3	3.25
SMS-1	39	39	HB	2005-10-12	37852	9	HB	10	12	2005	12		FL	Schoolmaster	U	305	300			7	3	D	7	3	B	0	Y	7	0		10	7	7.33333
SMS-1	40	40	FMRI	2006-06-02	38336	7	HB	6	2	2006	11		FL	Schoolmaster	F	332	300			4	1	D	3	4	D	1	N	3.5	0.142857		6	4	4
SMS-1	41	41	FMRI	2006-06-02	38337	19	HB	6	2	2006	11		FL	Schoolmaster	F	275	247			3	1	E	3	1	F	0	Y	3	0		6	3	3
SMS-1	42	42	FMRI	2006-06-29	KY0600102	D	PR	6	29	2006	12		FL	Schoolmaster	M	253	248			4	1	E	4	1	F	0	Y	4	0		6	4	4
SMS-1	43	43	FMRI	2006-06-29	KY0600103	D	PR	6	29	2006	12		FL	Schoolmaster	M	265	260			4	2	D	4	1	D	0	Y	4	0		6	4	4
SMS-1	44	44	FMRI	2006-06-29	KY0600104	D	PR	6	29	2006	12		FL	Schoolmaster	M	256	250			3	1	E	3	1	D	0	Y	3	0		6	3	3
SMS-1	45	45	FMRI	2006-06-29	KY0600105	D	PR	6	29	2006	12		FL	Schoolmaster	M	255	249					A	4	2	D						6	4	4
SMS-1	46	46	FMRI	2006-07-08	38372	1	HB	7	8	2006	11		FL	Schoolmaster	M	325	297			4	2	E	4	2	D	0	Y	4	0		7	4	4.08333
SMS-1	47	13		2008-03-03	LAp-1		FI	3	3	2008			USVI	Schoolmaster	U	408.83	387			11	3	D	11	4	C	0	Y	11	0		3	12	11.75
SMS-1	48	14		2008-03-03	LAp-2		FI	3	3	2008			USVI	Schoolmaster	U	353.21	333			6	1	C	5	1	C	1	N	5.5	0.0909091		3	5	4.75
SMS-1	49	15		2008-03-03	LAp-3		FI	3	3	2008			USVI	Schoolmaster	U	340.85	321			5	2	C	7	4	C	-2	N	6	0.166667		3	8	7.75
SMS-1	50	16		2008-03-03	LAp-4		FI	3	3	2008			USVI	Schoolmaster	U	355.27	335			3	3	C	3	4	C	0	Y	3	0		3	4	3.75
SMS-1	51	17		2008-03-04	LAp-5		FI	3	4	2008			USVI	Schoolmaster	U	401.62	380			8	3	C	9	4	D	-1	N	8.5	0.0588235		3	9	8.75
SMS-1	52	1	FMRI	2008-05-16	KY0800326	D	HB	5	16	2008	12		FL	Schoolmaster		263	254			3	2	C	4	4	D	-1	N	3.5	0.142857		5	3	2.91667
SMS-1	53	2	HB	2008-06-18	40490	11	HB	6	18	2010	12		FL	Schoolmaster		295	275			5	1	E	5	1	E	0	N	5	0		6	5	5
SMS-1	54	3	FMRI	2009-07-11	KY0900482	D	PC	7	11	2009	12		FL	Schoolmaster		318	310			4	2	D	4	2	E	0	Y	4	0		7	4	4.08333
SMS-1	55	4	HB	2008-06-18	40490	12	HB	6	18	2008	12		FL	Schoolmaster		302	282			5	2	D	7	1	D	-2	N	6	0.166667		6	5	5
SMS-1	56	5	FMRI	2008-08-03	KY0800582	D	HB	8	3	2008	12		FL	Schoolmaster		262				3	3	D	4	2	D	-1	N	3.5	0.142857		8	3	3.16667
SMS-1	57	6	FMRI	2009-05-17	TQ0902169	D	HB	5	17	2009	11		FL	Schoolmaster		440	412			37	4	C	42			-5	N	39.5	0.0632911		5	42	41.9167
SMS-1	58	1	FMRI	2011-05-04	MI1100699-D		HB	5	4	2011	11		FL	Schoolmaster	M	311	295			3	4	D	4	4	D	-1	N	3.5	0.142857		5	4	3.91667
SMS-1	59	2	FMRI	2011-05-04	MI11001104-D		PC	5	4	2011	11		FL	Schoolmaster	M	320	304			4	1	D	5	1	D	-1	N	4.5	0.111111		5	4	3.91667
SMS-1	60	3	HB	2011-05-21	43294	4	HB	5	21	2011	11		FL	Schoolmaster	F	262	248		0.22	3	1	D	3	1	D	0	Y	3	0		5	3	2.91667
SMS-1	61	4	HB	2012-03-14	44202	5	HB	3	14	2012	12		FL	Schoolmaster	F	255	238		0.26	3	4	D	3	4	D	0	Y	3	0		3	4	3.75
SMS-1	62	5	HB	2012-05-19	44273	4	HB	5	19	2012	12		FL	Schoolmaster	F	475	460		1.66	20	1	D	22	4		-2	N	21	0.047619		5	22	21.9167
SMS-1	63	6	HB	2012-05-19	44273	5	HB	5	19	2012	12		FL	Schoolmaster	M	447	420		1.5	11	2	D	12	4	D	-1	N	11.5	0.0434783		5	11	10.9167
SMS-1	64	7	HB	2012-06-21	44703	2	HB	6	21	2012	12		FL	Schoolmaster	u	312	280		0.46	4	1	D	4	1	D	0	Y	4	0		6	4	4
SMS-1	65	8	HB	2012-06-21	44703	3	HB	6	21	2012	12		FL	Schoolmaster	u	292	270		0.44	5	2	D	5	1	D	0	Y	5	0		6	5	5
SMS-1	66	9	HB	2012-06-22	44705	10	HB	6	22	2012	12		FL	Schoolmaster	M	325	295		0.6	4	4	D	6	2	D	-2	N	5	0.2		6	5	5
SMS-1	67	10	HB	2012-06-22	44705	11	HB	6	22	2012	12		FL	Schoolmaster	M	325	290		0.52	5	1	D	5	1	D	0	N	5	0		6	5	5
SMS-1	68	11	HB	2012-07-06	44723	23	HB	7	6	2012	12		FL	Schoolmaster	M	285	260		0.35	4	2	D	5	1	C	-1	N	4.5	0.111111		7	4	4.08333
SMS-1	69	12	HB	2012-07-12	44730	2	HB	7	12	2012	12		FL	Schoolmaster	U	312	285		0.49	6	1	D	6	2	D	0	Y	6	0		7	6	6.08333
SMS-1	70	13	HB	2012-07-29	44732	7	HB	7	29	2012	12		FL	Schoolmaster	M	322	295		0.47	5	2	D	5	2	D	0	Y	5	0		7	5	5.08333
SMS-1	71	14	HB	2012-07-29	44732	8	HB	7	29	2012	12		FL	Schoolmaster	M	295	275		0.41	4	2	D	4	2	D	0	Y	4	0		7	4	4.08333
SMS-1	72	15	HB	2012-07-03	44719	3	HB	7	3	2012	12		FL	Schoolmaster	F	275	260		0.35	5	2	D	5	2	D	0	Y	5	0		7	5	5.08333
SMS-1	73	16	HB	2012-11-01	44799	21	HB	11	1	2012	12		FL	Schoolmaster	M	270	252		0.32	4	4	D	5	3	D	-1	N	4.5	0.111111		11	4	4.41667
SMS-1	74	17	HB	2013-05-25	45606	1	HB	5	25	2013	12		FL	Schoolmaster	U	290	275		0.41	3	2	D	4	4	D	-1	N	3.5	0.142857		5	3	2.91667
SMS-1	75	18	HB	2013-05-25	45606	12	HB	5	25	2013	12		FL	Schoolmaster	U	275	248		0.3	2	4	D	2	4	D	0	Y	2	0		5	3	2.91667
SMS-1	76	19	HB	2013-05-31	45612	4	HB	5	31	2013	12		FL	Schoolmaster	F	505	475		1.78	18	1	D	18	4		0	Y	18	0		5	19	18.9167
SMS-1	77	20	HB	2013-06-04	45617	23	HB	6	4	2013	12		FL	Schoolmaster	F	282	265		0.36												6
SMS-1	78	21	HB	2013-07-07	45649	27	HB	7	7	2013	12		FL	Schoolmaster	F	287	267		0.42	2	2	E	3	1	D	-1	N	2.5	0.2		7	2	2.08333
SMS-1	79	22	HB	2013-07-07	45649	28	HB	7	7	2013	12		FL	Schoolmaster	F	280	267		0.37	3	1	D	3	2	D	0	Y	3	0		7	3	3.08333
SMS-1	80	23	HB	2013-07-08	45650	1	HB	7	8	2013	12		FL	Schoolmaster	U	257	240		0.28	2	2	B	3	2	B	-1	N	2.5	0.2		7	3	3.08333
SMS-1	81	24	HB	2013-07-08	45650	26	HB	7	8	2013	12		FL	Schoolmaster	F	305	285		0.52	3	2	C	4	2	E	-1	N	3.5	0.142857		7	4	4.08333
SMS-1	82	28	HB	2013-08-24	45689	11	HB	8	24	2013	12		FL	Schoolmaster	U	282	260		0.39	2	2	D	3	2	D	-1	N	2.5	0.2		8	3	3.16667
SMS-1	83	29	HB	2013-09-13	45698	12	HB	9	13	2013	12		FL	Schoolmaster	M	285	265		0.34	3	2	D	3	3	D	0	Y	3	0		9	3	3.25
SMS-1	84	30	HB	2013-10-09	46211	2	HB	10	9	2013	12		FL	Schoolmaster	U	270	255		0.38	3	2	D	3	2	D	0	Y	3	0		10	3	3.33333
SMS-1	85	31	HB	2013-10-09	46211	3	HB	10	9	2013	12		FL	Schoolmaster	U	260	240		0.38	3	2	D	3	3	D	0	Y	3	0		10	3	3.33333
SMS-1	86	32	TIP	2014-02-20	20141720825		CM	2	20	2014			FL	Schoolmaster		339.82	320			6	3	C	6	3	D	0	Y	6	0		2	7	6.66667
SMS-1	87	33	HB	2014-06-14	46737	20	HB	6	14	2014	12		FL	Schoolmaster	F	275	260		0.32	2	4	D	3	2	C	-1	N	2.5	0.2		6	3	3
SMS-1	88	34	HB	2014-05-20	46708	6	HB	5	20	2014	12		FL	Schoolmaster	M	260	242		0.26	2	2	D	3	4	D	-1	N	2.5	0.2		5	3	2.91667
SMS-1	89	35	HB	2014-07-10	46631	1	HB	7	10	2014	11		FL	Schoolmaster	F	312	294		0.55	3	2	D	4	2	D	-1	N	3.5	0.142857		7	3	3.08333
SMS-1	90	36	HB	2014-07-12	46769	1	HB	7	12	2014	12		FL	Schoolmaster	F	315	292		0.47	3	2	E	4	2	D	-1	N	3.5	0.142857		7	4	4.08333
SMS-1	91	37	HB	2014-08-05	46785	1	HB	8	5	2014	12		FL	Schoolmaster	M	282	262		0.37	4	2	D	4	2	D	0	Y	4	0		8	4	4.16667
SMS-1	92	38	HB	2014-08-08	46790	4	HB	8	8	2014	12		FL	Schoolmaster	M	327	305		0.66	2	3	C	3	2	D	-1	N	2.5	0.2		8	3	3.16667
SMS-1	93	39	HB	2014-08-12	46799	10	HB	8	12	2014	12		FL	Schoolmaster	F	265	250		0.55	3	2	D	3	2	D	0	Y	3	0		8	3	3.16667
SMS-1	94	40	HB	2014-08-13	46901	8	HB	8	13	2014	12		FL	Schoolmaster	M	250	237		0.28												8
SMS-1	95	41	HB	2014-11-25	47450	1	HB	11	25	2014	12		FL	Schoolmaster	M	276	260		0.375	4	2	C	5	3	C	-1	N	4.5	0.111111		11	5	5.41667
SMS-1	96	42	HB	2014-09-15	46929	12	HB	9	5	2014	12		FL	Schoolmaster	U	317	297		0.69	4	2	D	4	2	D	0	Y	4	0		9	4	4.25
SMS-1	97	43	HB	2014-09-09	46931	24	HB	9	9	2014	12		FL	Schoolmaster	F	262	245		0.32	3	2	D	3	2	D	0	Y	3	0		9	3	3.25
SMS-1	98	44	HB	2014-09-26	46947	4	HB	9	26	2014	12		FL	Schoolmaster	M	267	250			3	2	C	3	3	D	0	Y	3	0		9	3	3.25
SMS-1	99	46	HB	2014-11-24	47505	6	HB	11	24	2014	12		FL	Schoolmaster	M	277	260		0.37	3	2	C	3	3	D	0	Y	3	0		11	3	3.41667
SMS-1	100	47	HB	2014-12-05	47512	1	HB	12	5	2014	12		FL	Schoolmaster	U	285	267		0.38	5	3	C	3	4	C	2	N	4	0.25		12	3	3.5
SMS-1		27	HB	2013-07-31	45665	4	HB	7	31	2013	12		FL	Schoolmaster	U	267	247		0.29												7
SMS-1		25	HB	2013-07-31	45664	3	HB	7	31	2013	12		FL	Schoolmaster	U	290	275		0.37												7
SMS-1		26	HB	2013-07-31	45665	3	HB	7	31	2013	12		FL	Schoolmaster	U	317	295		0.54												7
SMS-2	1		PC	2014-10-18	KY1401040		PC	10	18	2014	12		FL	Schoolmaster	M	402.65	381		1.14	9	3	C	9	3	C	0	Y	9	0		10	9	9.33333
SMS-2	2		HB	2015-04-07	47740		HB	4	17	2014	12		FL	Schoolmaster	U	260	245		0.3	4	4	E	4	4	E	0	Y	4	0		4	5	4.83333
SMS-2	3		HB	2015-04-09	47744	2	HB	4	19	2015	12		FL	Schoolmaster	U	260	242		0.28	3	1	D	2	4	D	1	N	2.5	0.2		4	3	2.83333
SMS-2	4		HB	2015-04-07	47740		HB	4	7	2015	12		FL	Schoolmaster	U	247	227		0.24	3	4	D	3	4	D	0	Y	3	0		4	4	3.83333
SMS-2	5		HB	2015-04-07	47740		HB	4	7	2015	12		FL	Schoolmaster	M	290	270		0.39	3	4	D	3	4	D	0	Y	3	0		4	4	3.83333
SMS-2	6		TIP	2015-09-29	20151722384		CM	9	29	2015	11		FL	Schoolmaster	U	324	303			5	3	D	5	4	D	0	Y	5	0		9	5	5.25
SMS-2	7		HB	2015-08-18	48400	2	HB	8	18	2015	12		FL	Schoolmaster	F	265	247			3	2	D	3	2	E	0	Y	3	0		8	3	3.16667
SMS-2	8		HB	2015-08-20	48405	17	HB	8	20	2015	12		FL	Schoolmaster	M	260	247			3	3	D	3	3	D	0	Y	3	0		8	3	3.16667
SMS-2	9		HB	2015-06-20	48041	1	HB	6	20	2015	12		FL	Schoolmaster	M	310	280		0.45	6	1	E	6	1	D	0	Y	6	0		6	6	6
SMS-2	10		HB	2015-06-20	48041	2	HB	6	20	2015	12		FL	Schoolmaster	M	282	265		0.36	3	1	E	2	4	D	1	N	2.5	0.2		6	3	3
SMS-2	11		HB	2015-06-20	48041	3	HB	6	20	2015	12		FL	Schoolmaster	F	277	260		0.35	3	1	E	3	1	D	0	Y	3	0		6	3	3
SMS-2	12		HB	2015-06-21	48045	3	HB	6	21	2015	12		FL	Schoolmaster	U	280	260		0.37	4	1	C	3	4	D	1	N	3.5	0.142857		6	4	4
SMS-2	13		HB	2015-07-11	48060	1	HB	7	11	2015	12		FL	Schoolmaster	U	250	232		0.24	3	2	D	3	2	D	0	Y	3	0		7	3	3.08333
SMS-2	14		HB	2015-07-11	48060	20	HB	7	11	2015	12		FL	Schoolmaster	F	292	275		0.43	4	2	E	4	2	D	0	Y	4	0		7	4	4.08333
SMS-2	15		HB	2015-07-11	48060	21	HB	7	11	2015	12		FL	Schoolmaster	F	265	247		0.27	3	2	D	3	2	D	0	Y	3	0		7	3	3.08333
SMS-2	16		HB	2015-08-08	48073	14	HB	8	8	2015	12		FL	Schoolmaster	M	260	240		0.25	3	2	E	3	2	D	0	Y	3	0		8	3	3.16667
SMS-2	17		HB	2015-08-14	48088	7	HB	8	14	2015	12		FL	Schoolmaster	F	300	280		0.43	3	2	D	3	2	D	0	Y	3	0		8	3	3.16667
SMS-2	18		HB	2015-08-14	48088	8	HB	8	14	2015	12		FL	Schoolmaster	F	272	255		0.32	4	3	D	4	3	D	0	Y	4	0		8	4	4.16667
SMS-2	19		HB	2015-08-14	48088	9	HB	8	14	2015	12		FL	Schoolmaster	M	245	227		0.23	3	2	E	3	2	D	0	Y	3	0		8	3	3.16667
SMS-2	20		HB	2015-08-18	48096	14	HB	8	18	2015	12		FL	Schoolmaster	M	285	265		0.36	4	2	D	4	2	D	0	Y	4	0		8	4	4.16667
SMS-2	21		HB	2015-08-18	48096	15	HB	8	18	2015	12		FL	Schoolmaster	F	270	255		0.32	4	2	D	4	2	D	0	Y	4	0		8	4	4.16667
SMS-2	22		HB	2015-08-18	48096	16	HB	8	18	2015	12		FL	Schoolmaster	F	290	270		0.43	4	2	D	4	2	D	0	Y	4	0		8	4	4.16667
SMS-2	23		HB	2015-08-18	48096	17	HB	8	18	2015	12		FL	Schoolmaster	F	260	240		0.27	3	3	C	3	2	D	0	Y	3	0		8	3	3.16667
SMS-2	24		HB	2015-08-18	48096	21	HB	8	18	2015	12		FL	Schoolmaster	F	287	265		0.38	3	2	C	3	2	D	0	Y	3	0		8	3	3.16667
SMS-2	25		HB	2015-08-18	48096	22	HB	8	18	2015	12		FL	Schoolmaster	M	250	235		0.27	3	2	D	3	2	D	0	Y	3	0		8	3	3.16667
SMS-2	26		HB	2015-08-18	48096	28	HB	8	18	2015	12		FL	Schoolmaster	M	275	260		0.39	4	2	D	4	2	D	0	Y	4	0		8	4	4.16667
SMS-2	27		HB	2015-08-18	48096	29	HB	8	18	2015	12		FL	Schoolmaster	M	262	247		0.34	4	2	C	4	2	D	0	Y	4	0		8	4	4.16667
SMS-2	28		HB	2015-08-18	48096	51	HB	8	18	2015	12		FL	Schoolmaster	M	265	250		0.34	4	2	C	5	2	C	-1	N	4.5	0.111111		8	4	4.16667
SMS-2	29		HB	2015-08-18	48096	52	HB	8	18	2015	12		FL	Schoolmaster	M	255	240		0.28	3	2	D	3	2	D	0	Y	3	0		8	3	3.16667
SMS-2	30		HB	2015-08-18	48096	55	HB	8	18	2015	12		FL	Schoolmaster	U	250	235		0.26	3	3	D	3	3	D	0	Y	3	0		8	3	3.16667
SMS-2	31		HB	2015-08-18	48096	63	HB	8	18	2015	12		FL	Schoolmaster	M	290	270			4	2	C	4	2	D	0	Y	4	0		8	4	4.16667
SMS-2	32		HB	2015-08-18	48096	64	HB	8	18	2015	12		FL	Schoolmaster	F	250	230			4	2	D	4	2	D	0	Y	4	0		8	4	4.16667
SMS-2	33		HB	2015-08-18	48099	9	HB	8	18	2015	12		FL	Schoolmaster	U	255	220		0.22	Broken					A						8
SMS-2	34		HB	2015-01-18	47566	48	HB	1	18	2015	12		FL	Schoolmaster	M	280	260		0.3	3	4	E	3	4	D	0	Y	3	0		1	4	3.58333
SMS-2	35		HB	2015-09-22	48426	1	HB	9	22	2015	12		FL	Schoolmaster	M	265	247			2	3	B	3	2	D	-1	N	2.5	0.2		9	2	2.25
SMS-2	36		HB	2015-09-22	48426	8	HB	9	22	2015	12		FL	Schoolmaster	U	252	237			3	4	C	3	2	D	0	Y	3	0		9	3	3.25
SMS-2	37		HB	2015-09-23	48428	1	HB	9	23	2015	12		FL	Schoolmaster	U	300	280		0.43	3	4	C	4	2		-1		3.5	0.142857		9	3	3.25
SMS-2	38		HB	2005-09-23	48428	4	HB	9	23	2015	12		FL	Schoolmaster	U	295	275		0.41			A			C						9
SMS-2	39		HB	2015-09-23	48428	5	HB	9	23	2015	12		FL	Schoolmaster	U	272	255		0.33	4	3	C	4	3	A	0	Y	4	0		9	4	4.25
SMS-2	40		HB	2015-09-23	48428	17	HB	9	23	2015	12		FL	Schoolmaster	M	265	247		0.3			A			D						9
SMS-2	41		HB	2015-09-23	48428	18	HB	9	23	2015	12		FL	Schoolmaster	M	277	260		0.37			A			A						9
SMS-2	42		HB	2015-09-23	48428	18	HB	9	23	2015	12		FL	Schoolmaster	M	252	237		0.26	3	3	C	4	4	A	-1	N	3.5	0.142857		9	3	3.25
SMS-2	43		HB	2015-11-13	48475	15	HB	11	13	2015	12		FL	Schoolmaster	U	260	245		0.3	3	3	C	3	3	C	0	Y	3	0		11	3	3.41667
SMS-2	44		HB	2015-11-13	48475	26	HB	11	13	2015	12		FL	Schoolmaster	U	275	260		0.32	2	2	B	3	3	D	-1	N	2.5	0.2		11	2	2.41667
SMS-2	45		HB	2015-11-13	48477	42	HB	11	13	2015	12		FL	Schoolmaster	F	247	230		0.22	2	2	C	2	2	D	0	Y	2	0		11	2	2.41667
SMS-2	46		HB	2015-11-18	48487	8	HB	11	18	2015	12		FL	Schoolmaster	U	280	260		0.35	6	4	C	6	4	C	0	N	6	0		11	6	6.41667
SMS-2	47		HB	2015-12-11	48805	1	HB	12	11	2015	12		FL	Schoolmaster	F	297	275			5	2	D	5	4	C	0	Y	5	0		12	5	5.5
SMS-2	48		HB	2015-12-11	48805	2	HB	12	11	2015	12		FL	Schoolmaster	F	272	252			4	3	D	4	3	C	0	Y	4	0		12	4	4.5
SMS-2	49		HB	2015-12-11	48805	3	HB	12	11	2015	12		FL	Schoolmaster	M	290	270			3		D	3	3	C	0	Y	3	0		12	3	3.5
SMS-2					46718	29	HB	5	25	2014	12		FL	Schoolmaster	U	310	290		0.43	4	4	C									5	5	4.91667
SMS-2					46718	47	HB	5	25	2014	12		FL	Schoolmaster	U	407	380		0.92	13	3	D									5	14	13.9167

## Sheet: Male_v_female
Date	Collection #	Sample #	Trip Type	Month	Day	Year	Area	County	State	Sex	TL_mm	BurtonRings	Burton_Edgetype	Burt_Quality	Potts_rings	PottsEdge	Potts Qual	Diff	Agree (Y?N)	Average	Error	APE	Month	CAL_Age	Frac_age
1999-06-15	99103800272	6	CM	6	15	1999	11		FL	F	310.98	4	2	D	6	2	D	-2	N	5	0.2		6	4	4
1999-07-14	99103800296	45	CM	7	14	1999	11		FL	F	299.65	5	3	D	5	2	C	0	Y	5	0		7	6	6.08333
1999-12-20	99103800477	28	CM	12	20	1999	11		FL	F	291.41	1			1	4	D	0		1	0		12	1	1.5
2005-08-13	TQ0502556	D	HB	8	13	2005	11		FL	F	310	9	2	C	11	2	D	-2	N	10	0.1		8	10	10.1667
2006-06-02	38336	7	HB	6	2	2006	11		FL	F	332	4	1	D	3	4	D	1	N	3.5	0.142857		6	4	4
2006-06-02	38337	19	HB	6	2	2006	11		FL	F	275	3	1	E	3	1	F	0	Y	3	0		6	3	3
2011-05-21	43294	4	HB	5	21	2011	11		FL	F	262	3	1	D	3	1	D	0	Y	3	0		5	3	2.91667
2012-03-14	44202	5	HB	3	14	2012	12		FL	F	255	3	4	D	3	4	D	0	Y	3	0		3	4	3.75
2012-05-19	44273	4	HB	5	19	2012	12		FL	F	475	20	1	D	22	4		-2	N	21	0.047619		5	22	21.9167
2012-07-03	44719	3	HB	7	3	2012	12		FL	F	275	5	2	D	5	2	D	0	Y	5	0		7	5	5.08333
2013-05-31	45612	4	HB	5	31	2013	12		FL	F	505	18	1	D	18	4		0	Y	18	0		5	19	18.9167
2013-07-07	45649	27	HB	7	7	2013	12		FL	F	287	2	2	E	3	1	D	-1	N	2.5	0.2		7	2	2.08333
2013-07-07	45649	28	HB	7	7	2013	12		FL	F	280	3	1	D	3	2	D	0	Y	3	0		7	3	3.08333
2013-07-08	45650	26	HB	7	8	2013	12		FL	F	305	3	2	C	4	2	E	-1	N	3.5	0.142857		7	4	4.08333
2014-06-14	46737	20	HB	6	14	2014	12		FL	F	275	2	4	D	3	2	C	-1	N	2.5	0.2		6	3	3
2014-07-10	46631	1	HB	7	10	2014	11		FL	F	312	3	2	D	4	2	D	-1	N	3.5	0.142857		7	3	3.08333
2014-07-12	46769	1	HB	7	12	2014	12		FL	F	315	3	2	E	4	2	D	-1	N	3.5	0.142857		7	4	4.08333
2014-08-12	46799	10	HB	8	12	2014	12		FL	F	265	3	2	D	3	2	D	0	Y	3	0		8	3	3.16667
2014-09-09	46931	24	HB	9	9	2014	12		FL	F	262	3	2	D	3	2	D	0	Y	3	0		9	3	3.25
2015-08-18	48400	2	HB	8	18	2015	12		FL	F	265	3	2	D	3	2	E	0	Y	3	0		8	3	3.16667
2015-06-20	48041	3	HB	6	20	2015	12		FL	F	277	3	1	E	3	1	D	0	Y	3	0		6	3	3
2015-07-11	48060	20	HB	7	11	2015	12		FL	F	292	4	2	E	4	2	D	0	Y	4	0		7	4	4.08333
2015-07-11	48060	21	HB	7	11	2015	12		FL	F	265	3	2	D	3	2	D	0	Y	3	0		7	3	3.08333
2015-08-14	48088	7	HB	8	14	2015	12		FL	F	300	3	2	D	3	2	D	0	Y	3	0		8	3	3.16667
2015-08-14	48088	8	HB	8	14	2015	12		FL	F	272	4	3	D	4	3	D	0	Y	4	0		8	4	4.16667
2015-08-18	48096	15	HB	8	18	2015	12		FL	F	270	4	2	D	4	2	D	0	Y	4	0		8	4	4.16667
2015-08-18	48096	16	HB	8	18	2015	12		FL	F	290	4	2	D	4	2	D	0	Y	4	0		8	4	4.16667
2015-08-18	48096	17	HB	8	18	2015	12		FL	F	260	3	3	C	3	2	D	0	Y	3	0		8	3	3.16667
2015-08-18	48096	21	HB	8	18	2015	12		FL	F	287	3	2	C	3	2	D	0	Y	3	0		8	3	3.16667
2015-08-18	48096	64	HB	8	18	2015	12		FL	F	250	4	2	D	4	2	D	0	Y	4	0		8	4	4.16667
2015-11-13	48477	42	HB	11	13	2015	12		FL	F	247	2	2	C	2	2	D	0	Y	2	0		11	2	2.41667
2015-12-11	48805	1	HB	12	11	2015	12		FL	F	297	5	2	D	5	4	C	0	Y	5	0		12	5	5.5
2015-12-11	48805	2	HB	12	11	2015	12		FL	F	272	4	3	D	4	3	C	0	Y	4	0		12	4	4.5
1999-08-24	99103800359	11	CM	8	24	1999	11		FL	M	255.36	4	2	C			A						8	4	4.16667
1999-10-12	99103800413	30	CM	10	12	1999	11		FL	M	336.73	10	3	D	11	3	D	-1	N	10.5	0.047619		10	10	10.3333
1999-11-23	99103800437	12	CM	11	23	1999	11		FL	M	293.47	4	4	E	4	4	D	0	Y	4	0		11	4	4.41667
1999-12-20	99103800477	27	CM	12	20	1999	11		FL	M	355.27	3	1	E	3	1	C	0	Y	3	0		12	3	3.5
2000-08-08	3800315	27	CM	8	8	2000	11		FL	M	314.07	3	3	B			A						8	3	3.16667
2000-06-02	3800256	7	CM	6	2	2000	11		FL	M	318.19	5	2	E	6	1	D	-1	N	5.5	0.0909091		6	6	6
2001-07-19	3800120	26	CM	7	19	2001	11		FL	M	332.61	8	2	D	8	1	C	0	Y	8	0		7	8	8.08333
2001-08-14	3800139	26	CM	8	14	2001	11		FL	M	331.58	5	4	E	6	2	D	-1	N	5.5	0.0909091		8	6	6.16667
2004-01-13	36213	9	HB	1	13	2004	Area 11			M	300	6	3	D	7	4	C	-1	N	6.5	0.0769231		1	7	6.58333
2004-05-10	36478	8	HB	5	10	2004	11		FL	M	342	6	1	E	6	4	D	0	Y	6	0		5	6	5.91667
2004-07-09	TQ0401427	D	PC	7	9	2004	11		FL	M	378	6	2	D	8	1	D	-2	N	7	0.142857		7	6	6.08333
2004-10-31	TQ0402638	D	PC	10	31	2004	11		FL	M	410	8	3	D	9	3	D	-1	N	8.5	0.0588235		10	8	8.33333
2005-06-18	37400	20	HB	6	18	2005	11		FL	M	327	5	2	C	6	1	D	-1	N	5.5	0.0909091		6	6	6
2005-07-14	TQ0501059	D	PC	7	14	2005	11		FL	M	322.31	7	2	C	8	1	D	-1	N	7.5	0.0666667		7	7	7.08333
2006-06-29	KY0600102	D	PR	6	29	2006	12		FL	M	253	4	1	E	4	1	F	0	Y	4	0		6	4	4
2006-06-29	KY0600103	D	PR	6	29	2006	12		FL	M	265	4	2	D	4	1	D	0	Y	4	0		6	4	4
2006-06-29	KY0600104	D	PR	6	29	2006	12		FL	M	256	3	1	E	3	1	D	0	Y	3	0		6	3	3
2006-06-29	KY0600105	D	PR	6	29	2006	12		FL	M	255			A	4	2	D						6	4	4
2006-07-08	38372	1	HB	7	8	2006	11		FL	M	325	4	2	E	4	2	D	0	Y	4	0		7	4	4.08333
2011-05-04	MI1100699-D		HB	5	4	2011	11		FL	M	311	3	4	D	4	4	D	-1	N	3.5	0.142857		5	4	3.91667
2011-05-04	MI11001104-D		PC	5	4	2011	11		FL	M	320	4	1	D	5	1	D	-1	N	4.5	0.111111		5	4	3.91667
2012-05-19	44273	5	HB	5	19	2012	12		FL	M	447	11	2	D	12	4	D	-1	N	11.5	0.0434783		5	11	10.9167
2012-06-22	44705	10	HB	6	22	2012	12		FL	M	325	4	4	D	6	2	D	-2	N	5	0.2		6	5	5
2012-06-22	44705	11	HB	6	22	2012	12		FL	M	325	5	1	D	5	1	D	0	N	5	0		6	5	5
2012-07-06	44723	23	HB	7	6	2012	12		FL	M	285	4	2	D	5	1	C	-1	N	4.5	0.111111		7	4	4.08333
2012-07-29	44732	7	HB	7	29	2012	12		FL	M	322	5	2	D	5	2	D	0	Y	5	0		7	5	5.08333
2012-07-29	44732	8	HB	7	29	2012	12		FL	M	295	4	2	D	4	2	D	0	Y	4	0		7	4	4.08333
2012-11-01	44799	21	HB	11	1	2012	12		FL	M	270	4	4	D	5	3	D	-1	N	4.5	0.111111		11	4	4.41667
2013-09-13	45698	12	HB	9	13	2013	12		FL	M	285	3	2	D	3	3	D	0	Y	3	0		9	3	3.25
2014-05-20	46708	6	HB	5	20	2014	12		FL	M	260	2	2	D	3	4	D	-1	N	2.5	0.2		5	3	2.91667
2014-08-05	46785	1	HB	8	5	2014	12		FL	M	282	4	2	D	4	2	D	0	Y	4	0		8	4	4.16667
2014-08-08	46790	4	HB	8	8	2014	12		FL	M	327	2	3	C	3	2	D	-1	N	2.5	0.2		8	3	3.16667
2014-11-25	47450	1	HB	11	25	2014	12		FL	M	276	4	2	C	5	3	C	-1	N	4.5	0.111111		11	5	5.41667
2014-09-26	46947	4	HB	9	26	2014	12		FL	M	267	3	2	C	3	3	D	0	Y	3	0		9	3	3.25
2014-11-24	47505	6	HB	11	24	2014	12		FL	M	277	3	2	C	3	3	D	0	Y	3	0		11	3	3.41667
2014-10-18	KY1401040		PC	10	18	2014	12		FL	M	402.65	9	3	C	9	3	C	0	Y	9	0		10	9	9.33333
2015-04-07	47740		HB	4	7	2015	12		FL	M	290	3	4	D	3	4	D	0	Y	3	0		4	4	3.83333
2015-08-20	48405	17	HB	8	20	2015	12		FL	M	260	3	3	D	3	3	D	0	Y	3	0		8	3	3.16667
2015-06-20	48041	1	HB	6	20	2015	12		FL	M	310	6	1	E	6	1	D	0	Y	6	0		6	6	6
2015-06-20	48041	2	HB	6	20	2015	12		FL	M	282	3	1	E	2	4	D	1	N	2.5	0.2		6	3	3
2015-08-08	48073	14	HB	8	8	2015	12		FL	M	260	3	2	E	3	2	D	0	Y	3	0		8	3	3.16667
2015-08-14	48088	9	HB	8	14	2015	12		FL	M	245	3	2	E	3	2	D	0	Y	3	0		8	3	3.16667
2015-08-18	48096	14	HB	8	18	2015	12		FL	M	285	4	2	D	4	2	D	0	Y	4	0		8	4	4.16667
2015-08-18	48096	22	HB	8	18	2015	12		FL	M	250	3	2	D	3	2	D	0	Y	3	0		8	3	3.16667
2015-08-18	48096	28	HB	8	18	2015	12		FL	M	275	4	2	D	4	2	D	0	Y	4	0		8	4	4.16667
2015-08-18	48096	29	HB	8	18	2015	12		FL	M	262	4	2	C	4	2	D	0	Y	4	0		8	4	4.16667
2015-08-18	48096	51	HB	8	18	2015	12		FL	M	265	4	2	C	5	2	C	-1	N	4.5	0.111111		8	4	4.16667
2015-08-18	48096	52	HB	8	18	2015	12		FL	M	255	3	2	D	3	2	D	0	Y	3	0		8	3	3.16667
2015-08-18	48096	63	HB	8	18	2015	12		FL	M	290	4	2	C	4	2	D	0	Y	4	0		8	4	4.16667
2015-01-18	47566	48	HB	1	18	2015	12		FL	M	280	3	4	E	3	4	D	0	Y	3	0		1	4	3.58333
2015-09-22	48426	1	HB	9	22	2015	12		FL	M	265	2	3	B	3	2	D	-1	N	2.5	0.2		9	2	2.25
2015-09-23	48428	18	HB	9	23	2015	12		FL	M	252	3	3	C	4	4	A	-1	N	3.5	0.142857		9	3	3.25
2015-12-11	48805	3	HB	12	11	2015	12		FL	M	290	3		D	3	3	C	0	Y	3	0		12	3	3.5

## Sheet: recreational length freq
TL_mm		TL bin 10mm	Bin	Frequency
238	293.104	150	150	0
321		160	160	0
304		170	170	0
360		180	180	0
327		190	190	0
331		200	200	0
306		210	210	0
263		220	220	0
300		230	230	0
342		240	240	1
378		250	250	8
410		260	260	17
327		270	270	18
322.31		280	280	17
310		290	290	17
290		300	300	9
305		310	310	8
332		320	320	9
275		330	330	9
253		340	340	2
265		350	350	1
256		360	360	1
255		370	370	0
325		380	380	1
263		390	390	0
295		400	400	0
318		410	410	3
302		420	420	0
262		430	430	0
440		440	440	1
311		450	450	1
320		460	460	0
262		470	470	0
255		480	480	1
475		490	490	0
447		500	500	0
312		510	510	1
292		520	520	0
325		530	530	0
325		540	540	0
285		550	550	0
312		560	560	0
322		570	570	0
295		580	580	0
275		590	590	0
270		600	600	0
290		610	610	0
275		620	620	0
505		630	630	0
282		640	640	0
287		650	650	0
280		660	660	0
257		670	670	0
305		680	680	0
282		690	690	0
285		700	700	0
270			More	0
260
275
260
312
315
282
327
265
250
276
317
262
267
277
285
267
290
317
402.65
260
260
247
290
265
260
310
282
277
280
250
292
265
260
300
272
245
285
270
290
260
287
250
275
262
265
255
250
290
250
255
280
265
252
300
295
272
265
277
252
260
275
247
280
297
272
290
310
407

## Sheet: edge_mlb
	Month	Burton_Edgetype
	1	3					Edgetype
	1	4				month	1	2	3	4
	1	4				1			1	2	3
	2	3				2			1		1
	3	1				3	1	1	3	2	7
	3	2				4	1	1		3	5
	3	3				5	7	5	1	4	17
	3	3				6	11	7		2	20
	3	3				7	4	22	1		27
	3	4				8		21	8	1	30
	3	4				9		4	4	3	11
	4	1				10		2	4		6
	4	2				11	0	5	1	2	8
	4	4				12	1	2	2		5
	4	4
	4	4
	5	1
	5	1
	5	1
	5	1
	5	1
	5	1
	5	1
	5	2
	5	2
	5	2
	5	2
	5	2
	5	3
	5	4
	5	4
	5	4
	5	4
	6	1
	6	1
	6	1
	6	1
	6	1
	6	1
	6	1
	6	1
	6	1
	6	1
	6	1
	6	2
	6	2
	6	2
	6	2
	6	2
	6	2
	6	2
	6	4
	6	4
	7	1
	7	1
	7	1
	7	1
	7	2
	7	2
	7	2
	7	2
	7	2
	7	2
	7	2
	7	2
	7	2
	7	2
	7	2
	7	2
	7	2
	7	2
	7	2
	7	2
	7	2
	7	2
	7	2
	7	2
	7	2
	7	2
	7	3
	8	2
	8	2
	8	2
	8	2
	8	2
	8	2
	8	2
	8	2
	8	2
	8	2
	8	2
	8	2
	8	2
	8	2
	8	2
	8	2
	8	2
	8	2
	8	2
	8	2
	8	2
	8	3
	8	3
	8	3
	8	3
	8	3
	8	3
	8	3
	8	3
	8	4
	9	2
	9	2
	9	2
	9	2
	9	3
	9	3
	9	3
	9	3
	9	4
	9	4
	9	4
	10	2
	10	2
	10	3
	10	3
	10	3
	10	3
	11	2
	11	2
	11	2
	11	2
	11	2
	11	3
	11	4
	11	4
	12	1
	12	2
	12	2
	12	3
	12	3

## Sheet: edge_jcp
		MonthP	PottsEdge
		1	4				Edge type
		1	4			Month	1	2	3	4
		1	4			1				3
		2	3			2			1
		3	4			3				7
		3	4			4				5
		3	4			5	4			10
		3	4			6	13	4		4
		3	4			7	9	19
		3	4			8		24	3
		3	4			9		2	3	1
		4	4			10		1	5
		4	4			11			3	1
		4	4			12	1			2
		4	4
		4	4
		5	1
		5	1
		5	1
		5	1
		5	4
		5	4
		5	4
		5	4
		5	4
		5	4
		5	4
		5	4
		5	4
		5	4
		6	1
		6	1
		6	1
		6	1
		6	1
		6	1
		6	1
		6	1
		6	1
		6	1
		6	1
		6	1
		6	1
		6	2
		6	2
		6	2
		6	2
		6	4
		6	4
		6	4
		6	4
		7	1
		7	1
		7	1
		7	1
		7	1
		7	1
		7	1
		7	1
		7	1
		7	2
		7	2
		7	2
		7	2
		7	2
		7	2
		7	2
		7	2
		7	2
		7	2
		7	2
		7	2
		7	2
		7	2
		7	2
		7	2
		7	2
		7	2
		7	2
		8	2
		8	2
		8	2
		8	2
		8	2
		8	2
		8	2
		8	2
		8	2
		8	2
		8	2
		8	2
		8	2
		8	2
		8	2
		8	2
		8	2
		8	2
		8	2
		8	2
		8	2
		8	2
		8	2
		8	2
		8	3
		8	3
		8	3
		8
		9	2
		9	2
		9	3
		9	3
		9	3
		9	4
		10	2
		10	3
		10	3
		10	3
		10	3
		10	3
		11	3
		11	3
		11	3
		11	4
		12	1
		12	4
		12	4
		12	4

## Sheet: AgeBias
BurtonRings	Potts_rings
1	1				Burton age	JCPAvgAge	n	difference
1	1				1	1	2	0											Range in size at age
2	2				2	2.8	10	-0.8
2	2				3	3.14	48	-0.14											121
3	2				4	4.22	32	-0.22											80
3	2				5	5.33	18	-0.33											136
2	3				6	6.18	11	-0.18											82
2	3				7	7.25	4	-0.25											221
2	3				8	8.75	4	-0.75											276
2	3				9	10	2	-1											340
2	3				10	11	1	-1											83
2	3				11	11.5	2	-0.5											92
2	3
2	3					Total	134												159	avg
3	3							age1-7	-0.274286
3	3							age8-11	-0.8125
3	3				PottsAge	MLBAvgAge
3	3				1	1	2
3	3				2	2.5	4
3	3				3	3.1	40
3	3				4	3.7	32
3	3				5	4.76	17
3	3				6	5.53	15
3	3				7	5.75	4
3	3				8	7	4
3	3				9	8.25	4
3	3				10
3	3				11	10	3
3	3
3	3
3	3
3	3
3	3
3	3
3	3
3	3
3	3
3	3
3	3
3	3
3	3
3	3
3	3
3	3
3	3
3	3
3	3
3	3
3	3
3	3
3	3
4	3
4	3
5	3
3	4
3	4
3	4
3	4
3	4
3	4
3	4
3	4
3	4
4	4
4	4
4	4
4	4
4	4
4	4
4	4
4	4
4	4
4	4
4	4
4	4
4	4
4	4
4	4
4	4
4	4
4	4
4	4
4	4
4	4
4	4
4	4
4	5
4	5
4	5
4	5
4	5
5	5
5	5
5	5
5	5
5	5
5	5
5	5
5	5
5	5
5	5
5	5
6	5
4	6
4	6
5	6
5	6
5	6
5	6
6	6
6	6
6	6
6	6
6	6
6	6
6	6
6	6
7	6
5	7
5	7
6	7
7	7
6	8
7	8
7	8
8	8
8	9
8	9
8	9
9	9
9	11
10	11
11	11
11	12
18	18
20	22
37	42

## Sheet: L-W
Schoolmaster
		TL-W			FL-W
		b	3.02		2.92
		a	-18.1506		-17.2667
	For form W=aTL**b
		a	1.32187e-08		3.19025e-08
		b	3.02		2.92
			n=94		n=87
			rsq = 0.92		rsq = 0.94
			MSE = 0.01622		MSE = 0.01234

## Sheet: VB Charts
			Age	Lsubt		Frac_age	TL_mm					Age	Lsubt
Linf	489		1	80.5602		1.5	291.41		Linf	472		1	198.479
K	0.18		2	147.842		1.58333	170		K	0.16		2	238.921
tzero	-0.0001		3	204.041		2.41667	247		tzero	-2.41		3	273.383
			4	250.982		2.25	265					4	302.75
			5	290.191		2.41667	275					5	327.774
			6	322.941		2.08333	287					6	349.099
			7	350.296		3.16667	245					7	367.271
			8	373.144		3.08333	250					8	382.756
			9	392.229		3.16667	250					9	395.951
			10	408.17		3.16667	250					10	407.195
			11	421.485		3.25	252					11	416.777
			12	432.607		3.25	252					12	424.942
			13	441.897		3.16667	255					13	431.9
			14	449.656		3	256					14	437.829
			15	456.137		3.08333	257					15	442.881
			16	461.551		3.33333	260					16	447.187
			17	466.072		2.91667	260					17	450.856
			18	469.849		2.83333	260					18	453.982
			19	473.004		3.16667	260					19	456.646
			20	475.639		3.16667	260					20	458.916
			21	477.84		3.16667	260					21	460.851
			22	479.678		3.41667	260					22	462.499
			23	481.214		3.16667	262					23	463.904
			24	482.496		2.91667	262					24	465.101
			25	483.568		3.25	262					25	466.121
			26	484.463		3.16667	263					26	466.99
			27	485.21		2.91667	263					27	467.731
			28	485.834		3.16667	265					28	468.362
			29	486.356		3.16667	265					29	468.9
			30	486.791		3.08333	265					30	469.358
			31	487.155		3.25	267					31	469.749
			32	487.459		3.33333	270					32	470.082
			33	487.713		3	275					33	470.365
			34	487.925		2.91667	275					34	470.607
			35	488.102		3	275					35	470.813
			36	488.25		3.41667	277					36	470.989
			37	488.374		3	277					37	471.138
			38	488.477		3.08333	280					38	471.266
			39	488.563		3.16667	282					39	471.374
			40	488.635		3	282					40	471.467
			41	488.695		3.25	285					41	471.546
			42	488.745		3.5	285					42	471.613
						3.16667	287
						3.25	290
						2.91667	290
						3.5	290
						3.16667	300
						3.25	300
						3.08333	312
						3.16667	314.07
						3.16667	327
						3.5	355.27
						3.16667	374
						3.75	238
						3.83333	247
						4.16667	250
						4	253
						4	255
						3.75	255
						4.16667	255.36
						4.16667	262
						4	265
						4.16667	265
						4.41667	270
						4.16667	270
						4.16667	272
						4.25	272
						4.5	272
						4.16667	275
						4	280
						3.58333	280
						4.16667	282
						4.08333	285
						4.16667	285
						3.83333	290
						4.16667	290
						4.16667	290
						4.08333	292
						4.41667	293.47
						4.08333	295
						4.5	304
						4.08333	305
						4	310.98
						3.91667	311
						4	312
						4.08333	315
						4.25	317
						4.08333	318
						3.91667	320
						3.91667	321
						4.08333	325
						4	332
						3.75	355.27
						4.83333	260
						5.08333	275
						5.41667	276
						5	292
						5	295
						5.5	297
						5	302
						5.08333	306
						4.91667	310
						5.08333	322
						5.25	324
						5	325
						5	325
						5	331
						4.75	353.21
						4.83333	360
						5.08333	453.12
						5.08333	496.38
						6.41667	280
						6.08333	299.65
						6	310
						6.08333	312
						6	318.19
						6	327
						6.16667	331.58
						5.91667	342
						6.08333	378
						6.08333	469.6
						6.08333	531.4
						5.91667	541.7
						6.08333	556.12
						6.58333	300
						7.33333	305
						7.08333	322.31
						6.66667	339.82
						7.91667	327
						8.08333	332.61
						7.75	340.85
						8.33333	410
						8.08333	645.73
						8.75	401.62
						9.33333	402.65
						10.1667	310
						10.3333	336.73
						10.9167	447
						11.75	408.83
						13.9167	407
						18.9167	505
						21.9167	475
						41.9167	440

## Sheet: growth
Collection #	Sample #	Trip Type	Month	Day	Year	State	Sex	TL_mm	CAL_Age	Frac_age	min size	inv wt		Frac_age	TL_mm	min size	wgt		bin	Bin	Frequency	inverse			Frac_age	TL_mm	min size	inv wt
48088	9	Rec	8	14	2015	FL	M	245	3	3.16667	254	0.0212766		3.16667	254	254	1		1	1	1	1			3.16667	254	254	0.0212766
48477	42	Rec	11	13	2015	FL	F	247	2	2.41667	254	0.2		2.41667	254	254	1		2	2	5	0.2			2.41667	254	254	0.2
47740			4	7	2015	FL	U	247	4	3.83333	254	0.025		3.83333	254	254	1		3	3	47	0.0212766			3.83333	254	254	0.025
48060	1	Rec	7	11	2015	FL	U	250	3	3.08333	254	0.0212766		3.08333	254	254	1		5	5	18	0.0555556			3.08333	254	254	0.0212766
48096	22	Rec	8	18	2015	FL	M	250	3	3.16667	254	0.0212766		3.16667	254	254	1		6	6	13	0.0769231			3.16667	254	254	0.0212766
48096	55	Rec	8	18	2015	FL	U	250	3	3.16667	254	0.0212766		3.16667	254	254	1		7	7	4	0.25			3.16667	254	254	0.0212766
48096	64	Rec	8	18	2015	FL	F	250	4	4.16667	254	0.025		4.16667	254	254	1		8	8	5	0.2			4.16667	254	254	0.025
48426	8	Rec	9	22	2015	FL	U	252	3	3.25	254	0.0212766		3.25	254	254	1		9	9	2	0.5			3.25	254	254	0.0212766
48428	18	Rec	9	23	2015	FL	M	252	3	3.25	254	0.0212766		3.25	254	254	1		10	10	2	0.5			3.25	254	254	0.0212766
KY0600102	D		6	29	2006	FL	M	253	4	4	254	0.025		4	254	254	1		11	11	1	1			4	254	254	0.025
KY0600105	D		6	29	2006	FL	M	255	4	4	254	0.025		4	255	254	1		12	12	1	1			4	255	254	0.025
44202	5		3	14	2012	FL	F	255	4	3.75	254	0.025		3.75	255	254	1		13	13	0	#DIV/0!			3.75	255	254	0.025
48096	52	Rec	8	18	2015	FL	M	255	3	3.16667	254	0.0212766		3.16667	255	254	1		14	14	1	1			3.16667	255	254	0.0212766
KY0600104	D		6	29	2006	FL	M	256	3	3	254	0.0212766		3	256	254	1		15	15	0	#DIV/0!			3	256	254	0.0212766
45650	1		7	8	2013	FL	U	257	3	3.08333	254	0.0212766		3.08333	257	254	1		16	16	0	#DIV/0!			3.08333	257	254	0.0212766
46211	3		10	9	2013	FL	U	260	3	3.33333	254	0.0212766		3.33333	260	254	1		17	17	0	#DIV/0!			3.33333	260	254	0.0212766
46708	6		5	20	2014	FL	M	260	3	2.91667	254	0.0212766		2.91667	260	254	1		18	18	0	#DIV/0!			2.91667	260	254	0.0212766
47740			4	17	2014	FL	U	260	5	4.83333	254	0.0555556		4.83333	260	254	1		19	19	1	1			4.83333	260	254	0.0555556
47744	2		4	19	2015	FL	U	260	3	2.83333	254	0.0212766		2.83333	260	254	1		20	20	0	#DIV/0!			2.83333	260	254	0.0212766
48405	17	Rec	8	20	2015	FL	M	260	3	3.16667	254	0.0212766		3.16667	260	254	1		21	21	0	#DIV/0!			3.16667	260	254	0.0212766
48073	14	Rec	8	8	2015	FL	M	260	3	3.16667	254	0.0212766		3.16667	260	254	1		22	22	1	1			3.16667	260	254	0.0212766
48096	17	Rec	8	18	2015	FL	F	260	3	3.16667	254	0.0212766		3.16667	260	254	1		23	23	0	#DIV/0!			3.16667	260	254	0.0212766
48475	15	Rec	11	13	2015	FL	U	260	3	3.41667	254	0.0212766		3.41667	260	254	1		24	24	0	#DIV/0!			3.41667	260	254	0.0212766
KY0800582	D		8	3	2008	FL		262	3	3.16667	254	0.0212766		3.16667	262	254	1		25	25	0	#DIV/0!			3.16667	262	254	0.0212766
43294	4		5	21	2011	FL	F	262	3	2.91667	254	0.0212766		2.91667	262	254	1		26	26	0	#DIV/0!			2.91667	262	254	0.0212766
46931	24		9	9	2014	FL	F	262	3	3.25	254	0.0212766		3.25	262	254	1		27	27	0	#DIV/0!			3.25	262	254	0.0212766
48096	29	Rec	8	18	2015	FL	M	262	4	4.16667	254	0.025		4.16667	262	254	1		28	28	0	#DIV/0!			4.16667	262	254	0.025
KY0800326	D		5	16	2008	FL		263	3	2.91667	254	0.0212766		2.91667	263	254	1		29	29	0	#DIV/0!			2.91667	263	254	0.0212766
KY0600103	D		6	29	2006	FL	M	265	4	4	254	0.025		4	265	254	1		30	30	0	#DIV/0!			4	265	254	0.025
46799	10		8	12	2014	FL	F	265	3	3.16667	254	0.0212766		3.16667	265	254	1		31	31	0	#DIV/0!			3.16667	265	254	0.0212766
48426	1	Rec	9	22	2015	FL	M	265	2	2.25	254	0.2		2.25	265	254	1		32	32	0	#DIV/0!			2.25	265	254	0.2
48400	2	Rec	8	18	2015	FL	F	265	3	3.16667	254	0.0212766		3.16667	265	254	1		33	33	0	#DIV/0!			3.16667	265	254	0.0212766
48060	21	Rec	7	11	2015	FL	F	265	3	3.08333	254	0.0212766		3.08333	265	254	1		34	34	0	#DIV/0!			3.08333	265	254	0.0212766
48096	51	Rec	8	18	2015	FL	M	265	4	4.16667	254	0.025		4.16667	265	254	1		35	35	0	#DIV/0!			4.16667	265	254	0.025
46947	4		9	26	2014	FL	M	267	3	3.25	254	0.0212766		3.25	267	254	1		37	37	0	#DIV/0!			3.25	267	254	0.0212766
44799	21		11	1	2012	FL	M	270	4	4.41667	254	0.025		4.41667	270	254	1		38	38	0	#DIV/0!			4.41667	270	254	0.025
46211	2		10	9	2013	FL	U	270	3	3.33333	254	0.0212766		3.33333	270	254	1		39	39	0	#DIV/0!			3.33333	270	254	0.0212766
48096	15	Rec	8	18	2015	FL	F	270	4	4.16667	254	0.025		4.16667	270	254	1		40	40	0	#DIV/0!			4.16667	270	254	0.025
48088	8	Rec	8	14	2015	FL	F	272	4	4.16667	254	0.025		4.16667	272	254	1		41	41	0	#DIV/0!			4.16667	272	254	0.025
48428	5	Rec	9	23	2015	FL	U	272	4	4.25	254	0.025		4.25	272	254	1		42	42	1	1			4.25	272	254	0.025
48805	2	Rec	12	11	2015	FL	F	272	4	4.5	254	0.025		4.5	272	254	1								4.5	272	254	0.025
38337	19	HB	6	2	2006	FL	F	275	3	3	254	0.0212766		3	275	254	1								3	275	254	0.0212766
44719	3		7	3	2012	FL	F	275	5	5.08333	254	0.0555556		5.08333	275	254	1								5.08333	275	254	0.0555556
45606	12		5	25	2013	FL	U	275	3	2.91667	254	0.0212766		2.91667	275	254	1								2.91667	275	254	0.0212766
46737	20		6	14	2014	FL	F	275	3	3	254	0.0212766		3	275	254	1								3	275	254	0.0212766
48475	26	Rec	11	13	2015	FL	U	275	2	2.41667	254	0.2		2.41667	275	254	1								2.41667	275	254	0.2
48096	28	Rec	8	18	2015	FL	M	275	4	4.16667	254	0.025		4.16667	275	254	1								4.16667	275	254	0.025
47450	1		11	25	2014	FL	M	276	5	5.41667	254	0.0555556		5.41667	276	254	1								5.41667	276	254	0.0555556
47505	6		11	24	2014	FL	M	277	3	3.41667	254	0.0212766		3.41667	277	254	1								3.41667	277	254	0.0212766
48041	3	Rec	6	20	2015	FL	F	277	3	3	254	0.0212766		3	277	254	1								3	277	254	0.0212766
45649	28		7	7	2013	FL	F	280	3	3.08333	254	0.0212766		3.08333	280	254	1								3.08333	280	254	0.0212766
48045	3	Rec	6	21	2015	FL	U	280	4	4	254	0.025		4	280	254	1								4	280	254	0.025
47566	48	Rec	1	18	2015	FL	M	280	4	3.58333	254	0.025		3.58333	280	254	1								3.58333	280	254	0.025
48487	8	Rec	11	18	2015	FL	U	280	6	6.41667	254	0.0769231		6.41667	280	254	1								6.41667	280	254	0.0769231
45689	11		8	24	2013	FL	U	282	3	3.16667	254	0.0212766		3.16667	282	254	1								3.16667	282	254	0.0212766
46785	1		8	5	2014	FL	M	282	4	4.16667	254	0.025		4.16667	282	254	1								4.16667	282	254	0.025
48041	2	Rec	6	20	2015	FL	M	282	3	3	254	0.0212766		3	282	254	1								3	282	254	0.0212766
44723	23		7	6	2012	FL	M	285	4	4.08333	254	0.025		4.08333	285	254	1								4.08333	285	254	0.025
45698	12		9	13	2013	FL	M	285	3	3.25	254	0.0212766		3.25	285	254	1								3.25	285	254	0.0212766
47512	1		12	5	2014	FL	U	285	3	3.5	254	0.0212766		3.5	285	254	1								3.5	285	254	0.0212766
48096	14	Rec	8	18	2015	FL	M	285	4	4.16667	254	0.025		4.16667	285	254	1								4.16667	285	254	0.025
45649	27		7	7	2013	FL	F	287	2	2.08333	254	0.2		2.08333	287	254	1								2.08333	287	254	0.2
48096	21	Rec	8	18	2015	FL	F	287	3	3.16667	254	0.0212766		3.16667	287	254	1								3.16667	287	254	0.0212766
37496	27	HB	9	10	2005	FL	U	290	3	3.25	254	0.0212766		3.25	290	254	1								3.25	290	254	0.0212766
45606	1		5	25	2013	FL	U	290	3	2.91667	254	0.0212766		2.91667	290	254	1								2.91667	290	254	0.0212766
48805	3	Rec	12	11	2015	FL	M	290	3	3.5	254	0.0212766		3.5	290	254	1								3.5	290	254	0.0212766
47740			4	7	2015	FL	M	290	4	3.83333	254	0.025		3.83333	290	254	1								3.83333	290	254	0.025
48096	16	Rec	8	18	2015	FL	F	290	4	4.16667	254	0.025		4.16667	290	254	1								4.16667	290	254	0.025
48096	63	Rec	8	18	2015	FL	M	290	4	4.16667	254	0.025		4.16667	290	254	1								4.16667	290	254	0.025
44703	3		6	21	2012	FL	u	292	5	5	254	0.0555556		5	292	254	1								5	292	254	0.0555556
48060	20	Rec	7	11	2015	FL	F	292	4	4.08333	254	0.025		4.08333	292	254	1								4.08333	292	254	0.025
40490	11		6	18	2010	FL		295	5	5	254	0.0555556		5	295	254	1								5	295	254	0.0555556
44732	8		7	29	2012	FL	M	295	4	4.08333	254	0.025		4.08333	295	254	1								4.08333	295	254	0.025
48805	1	Rec	12	11	2015	FL	F	297	5	5.5	254	0.0555556		5.5	297	254	1								5.5	297	254	0.0555556
36213	9		1	13	2004		M	300	7	6.58333	254	0.25		6.58333	300	254	1								6.58333	300	254	0.25
48088	7	Rec	8	14	2015	FL	F	300	3	3.16667	254	0.0212766		3.16667	300	254	1								3.16667	300	254	0.0212766
48428	1	Rec	9	23	2015	FL	U	300	3	3.25	254	0.0212766		3.25	300	254	1								3.25	300	254	0.0212766
40490	12		6	18	2008	FL		302	5	5	254	0.0555556		5	302	254	1								5	302	254	0.0555556
37852	9	HB	10	12	2005	FL	U	305	7	7.33333	254	0.25		7.33333	305	254	1								7.33333	305	254	0.25
45650	26		7	8	2013	FL	F	305	4	4.08333	254	0.025		4.08333	305	254	1								4.08333	305	254	0.025
TQ0502556	D		8	13	2005	FL	F	310	10	10.1667	254	0.5		10.1667	310	254	1								10.1667	310	254	0.5
46718	29		5	25	2014	FL	U	310	5	4.91667	254	0.0555556		4.91667	310	254	1								4.91667	310	254	0.0555556
48041	1	Rec	6	20	2015	FL	M	310	6	6	254	0.0769231		6	310	254	1								6	310	254	0.0769231
MI1100699-D			5	4	2011	FL	M	311	4	3.91667	254	0.025		3.91667	311	254	1								3.91667	311	254	0.025
44703	2		6	21	2012	FL	u	312	4	4	254	0.025		4	312	254	1								4	312	254	0.025
44730	2		7	12	2012	FL	U	312	6	6.08333	254	0.0769231		6.08333	312	254	1								6.08333	312	254	0.0769231
46631	1		7	10	2014	FL	F	312	3	3.08333	254	0.0212766		3.08333	312	254	1								3.08333	312	254	0.0212766
3800315	27		8	8	2000	FL	M	314.07	3	3.16667	254	0.0212766		3.16667	314.07	254	1								3.16667	314.07	254	0.0212766
46769	1		7	12	2014	FL	F	315	4	4.08333	254	0.025		4.08333	315	254	1								4.08333	315	254	0.025
46929	12		9	5	2014	FL	U	317	4	4.25	254	0.025		4.25	317	254	1								4.25	317	254	0.025
KY0900482	D		7	11	2009	FL		318	4	4.08333	254	0.025		4.08333	318	254	1								4.08333	318	254	0.025
3800256	7		6	2	2000	FL	M	318.19	6	6	254	0.0769231		6	318.19	254	1								6	318.19	254	0.0769231
MI11001104-D			5	4	2011	FL	M	320	4	3.91667	254	0.025		3.91667	320	254	1								3.91667	320	254	0.025
44732	7		7	29	2012	FL	M	322	5	5.08333	254	0.0555556		5.08333	322	254	1								5.08333	322	254	0.0555556
TQ0501059	D	PC	7	14	2005	FL	M	322.31	7	7.08333	254	0.25		7.08333	322.31	254	1								7.08333	322.31	254	0.25
20151722384			9	29	2015	FL	U	324	5	5.25	254	0.0555556		5.25	324	254	1								5.25	324	254	0.0555556
38372	1	HB	7	8	2006	FL	M	325	4	4.08333	254	0.025		4.08333	325	254	1								4.08333	325	254	0.025
44705	10		6	22	2012	FL	M	325	5	5	254	0.0555556		5	325	254	1								5	325	254	0.0555556
44705	11		6	22	2012	FL	M	325	5	5	254	0.0555556		5	325	254	1								5	325	254	0.0555556
37400	20		6	18	2005	FL	M	327	6	6	254	0.0769231		6	327	254	1								6	327	254	0.0769231
46790	4		8	8	2014	FL	M	327	3	3.16667	254	0.0212766		3.16667	327	254	1								3.16667	327	254	0.0212766
3800139	26		8	14	2001	FL	M	331.58	6	6.16667	254	0.0769231		6.16667	331.58	254	1								6.16667	331.58	254	0.0769231
38336	7	HB	6	2	2006	FL	F	332	4	4	254	0.025		4	332	254	1								4	332	254	0.025
3800120	26		7	19	2001	FL	M	332.61	8	8.08333	254	0.2		8.08333	332.61	254	1								8.08333	332.61	254	0.2
20141720825			2	20	2014	FL		339.82	7	6.66667	254	0.25		6.66667	339.82	254	1								6.66667	339.82	254	0.25
36478	8		5	10	2004	FL	M	342	6	5.91667	254	0.0769231		5.91667	342	254	1								5.91667	342	254	0.0769231
KY0500380	D	CM	8	17	2005	FL	U	374	3	3.16667	254	0.0212766		3.16667	374	254	1								3.16667	374	254	0.0212766
TQ0401427	D		7	9	2004	FL	M	378	6	6.08333	254	0.0769231		6.08333	378	254	1								6.08333	378	254	0.0769231
KY1401040			10	18	2014	FL	M	402.65	9	9.33333	254	0.5		9.33333	402.65	254	1								9.33333	402.65	254	0.5
46718	47		5	25	2014	FL	U	407	14	13.9167	254	1		13.9167	407	254	1								13.9167	407	254	1
TQ0402638	D	PC	10	31	2004	FL	M	410	8	8.33333	254	0.2		8.33333	410	254	1								8.33333	410	254	0.2
TQ0902169	D		5	17	2009	FL		440	42	41.9167	254	1		41.9167	440	254	1								41.9167	440	254	1
44273	5		5	19	2012	FL	M	447	11	10.9167	254	1		10.9167	447	254	1								10.9167	447	254	1
3800146	5		7	1	2003	FL	M	453.12	5	5.08333	254	0.0555556		5.08333	453.12	254	1								5.08333	453.12	254	0.0555556
3800146	6		7	1	2003	FL	M	469.6	6	6.08333	254	0.0769231		6.08333	469.6	254	1								6.08333	469.6	254	0.0769231
44273	4		5	19	2012	FL	F	475	22	21.9167	254	1		21.9167	475	254	1								21.9167	475	254	1
3800168	27		7	23	2003	FL	F	496.38	5	5.08333	254	0.0555556		5.08333	496.38	254	1								5.08333	496.38	254	0.0555556
45612	4		5	31	2013	FL	F	505	19	18.9167	254	1		18.9167	505	254	1								18.9167	505	254	1
3800168	26		7	23	2003	FL	F	531.4	6	6.08333	254	0.0769231		6.08333	531.4	254	1								6.08333	531.4	254	0.0769231
3800133	15		5	29	2003	FL	M	541.7	6	5.91667	254	0.0769231		5.91667	541.7	254	1								5.91667	541.7	254	0.0769231
3800146	4		7	1	2003	FL	M	556.12	6	6.08333	254	0.0769231		6.08333	556.12	254	1								6.08333	556.12	254	0.0769231
3800146	3		7	1	2003	FL	M	645.73	8	8.08333	254	0.2		8.08333	645.73	254	1								8.08333	645.73	254	0.2
BFT2004001	1		1	14	2004	NC		170	2	1.58333	0	0.2		1.58333	170	0	1								1.58333	170	0	0.2
5849	9		3	14	1981	FL		238	4	3.75	0	0.025		3.75	238	0	1								3.75	238	0	0.025
99103800359	11		8	24	1999	FL	M	255.36	4	4.16667	0	0.025		4.16667	255.36	0	1								4.16667	255.36	0	0.025
19728	4		8	10	1991	FL		263	3	3.16667	0	0.0212766		3.16667	263	0	1								3.16667	263	0	0.0212766
99103800477	28		12	20	1999	FL	F	291.41	1	1.5	0	1		1.5	291.41	0	1								1.5	291.41	0	1
99103800437	12		11	23	1999	FL	M	293.47	4	4.41667	0	0.025		4.41667	293.47	0	1								4.41667	293.47	0	0.025
99103800296	45		7	14	1999	FL	F	299.65	6	6.08333	0	0.0769231		6.08333	299.65	0	1								6.08333	299.65	0	0.0769231
13754	9		12	10	1985	FL		304	4	4.5	0	0.025		4.5	304	0	1								4.5	304	0	0.025
17947	4		7	6	1988	FL		306	5	5.08333	0	0.0555556		5.08333	306	0	1								5.08333	306	0	0.0555556
99103800272	6		6	15	1999	FL	F	310.98	4	4	0	0.025		4	310.98	0	1								4	310.98	0	0.025
12363	5		5	14	1985	FL		321	4	3.91667	0	0.025		3.91667	321	0	1								3.91667	321	0	0.025
14527	13		5	6	1986	FL		327	8	7.91667	0	0.2		7.91667	327	0	1								7.91667	327	0	0.2
14595	9		6	6	1986	FL		331	5	5	0	0.0555556		5	331	0	1								5	331	0	0.0555556
99103800413	30		10	12	1999	FL	M	336.73	10	10.3333	0	0.5		10.3333	336.73	0	1								10.3333	336.73	0	0.5
LAp-3			3	3	2008	USVI	U	340.85	8	7.75	0	0.2		7.75	340.85	0	1								7.75	340.85	0	0.2
LAp-2			3	3	2008	USVI	U	353.21	5	4.75	0	0.0555556		4.75	353.21	0	1								4.75	353.21	0	0.0555556
99103800477	27		12	20	1999	FL	M	355.27	3	3.5	0	0.0212766		3.5	355.27	0	1								3.5	355.27	0	0.0212766
LAp-4			3	3	2008	USVI	U	355.27	4	3.75	0	0.025		3.75	355.27	0	1								3.75	355.27	0	0.025
14171	6		4	18	1986	FL		360	5	4.83333	0	0.0555556		4.83333	360	0	1								4.83333	360	0	0.0555556
LAp-5			3	4	2008	USVI	U	401.62	9	8.75	0	0.5		8.75	401.62	0	1								8.75	401.62	0	0.5
LAp-1			3	3	2008	USVI	U	408.83	12	11.75	0	1		11.75	408.83	0	1								11.75	408.83	0	1

## Sheet: AgeBias W95CI
		Data
	Burton age	Average of Potts Age	Count of Potts Age2	StdDev of Potts Age3
	1	1	1	#DIV/0!
	2	2.88889	9	0.600925
	3	3.2619	42	0.543679
	4	4.24324	37	0.494717
	5	5.47368	19	1.02026
	6	6.09091	11	0.831209
	7	7.6	5	0.547723
	8	8.66667	3	0.57735
	9	10	3	1
	10	11	1	#DIV/0!
	11	13	1	#DIV/0!
	12	12	1	#DIV/0!
	14
	18	19	1	#DIV/0!
	20	23	1	#DIV/0!
	38	42	1	#DIV/0!
	(blank)	3.5	2	0.707107
	Grand Total	5.16667	138	4.2402
		Data
	Burton age	Average of Potts Age	Count of Potts Age2	StdDev of Potts Age3	95% CI
	0
	1	1	1
	2	2.88889	9	0.600925	0.461912
	3	3.2619	42	0.543679	0.169422
	4	4.24324	37	0.494717	0.164947
	5	5.47368	19	1.02026	0.491751
	6	6.09091	11	0.831209	0.558414
	7	7.6	5	0.547723	0.680087
	8	8.66667	3	0.57735	1.43422
	9	10	3	1	2.48414
	10	11	1
	11	13	1
	12	12	1
	14
	18	19	1
	20	23	1
	38	42	1
			136
